# Supplementary material
Source: MDPI journal article supplement (https://www.mdpi.com/2673-9488/3/4/46)
Supplement: s1 [file s1]

|                 |   |   |   |   |   |   |    |   |      |   |
|-----------------|---|---|---|---|---|---|----|---|------|---|
| Glucose (n=2)   | - | - | - | - | - | - | NE | - | -13% | - |
| Full recovery = | - | - | - | - | - | - | -  | - | 1d   | - |

<sup>a</sup>= approximately, estimated from a figure, <sup>b</sup>= only after 1 wk post, Alt= alterations in rhythm, ~Ext= almost extinguished, Ext= extinguished, Dec= decline (no percentage could be obtained reasonably from data), Inc= increase (no percentage could be obtained reasonably from data), NE= no effect, No= not recovered, ^= increased or decreased further after post- point, N/A= dichotomy in reported results in text and table, <sup>c</sup>= circadian rhythm normalized, but plasma cortisol rhythm did not, ?= recovery cannot be assessed due to marker not being affected at post-measurement, only affected at recovery, Elev= marker elevated over pre-values, after being declined at post, Low= marker below pre-values, after being elevated at post, ND= no recovery data, Norm= returned to normal values, not BL.
