# Supplementary material
Source: MDPI journal article supplement (https://www.mdpi.com/2673-9488/3/4/46)
Supplement: s1 [file s1]

**SUPPLEMENTARY TABLE 2. Summary of physical performance recovery in studies**

| Study                  | Physical performance markers measured | Physical performance markers recovered | Physical performance markers not recovered | Physical performance markers not affected during training | Recovery measured for |
|------------------------|---------------------------------------|----------------------------------------|--------------------------------------------|-----------------------------------------------------------|-----------------------|
| Conkright et al. 2020  | 8                                     | 2                                      | 4 <sup>a</sup>                             | 2                                                         | 6 weeks               |
| Hamarsland et al. 2018 | 3                                     | 2                                      | 1                                          | 0                                                         | 2 weeks               |
| Nindl et al. 1997      | 3                                     | 3                                      | 0                                          | 0                                                         | 5 weeks               |
| Vikmoen et al. 2020    | 3                                     | 2                                      | 1                                          | 0                                                         | 2 weeks               |

Note: “physical performance markers measured” includes only markers and studies of which data was reported also during recovery. Therefore, study by Szivak et al. (2018) is not included here due to missing recovery data on physical performance measures. Note: if a marker was increased over pre values at recovery after being decreased compared to pre during training, it was considered recovered. Or, if a marker was decreased during training, but increased compared to pre at recovery point, it was also considered recovered).

<sup>a</sup>= 300yd run time only increased at recovery point, not at post-measurement, therefore can’t be counted as recovered or not. Categorized here to not be recovered.
