# Supplementary material
Source: MDPI journal article supplement (https://www.mdpi.com/2673-9488/3/4/46)
Supplement: s1 [file s1]

**SUPPLEMENTARY TABLE 4. Summary of physical performance and biomarker recovery.**

| Study             | Biomarkers recovered (or not affected during training?) | Physical performance markers recovered (or not affected during training)? | % Of measured markers recovered/not affected? | Recovery measured for  |
|-------------------|---------------------------------------------------------|---------------------------------------------------------------------------|-----------------------------------------------|------------------------|
| Conkright et al.  | Not measured                                            | 4/8                                                                       | 50%                                           | 6 weeks                |
| Hamarsland et al. | 11/13                                                   | 2/3                                                                       | 81%                                           | 1+2 weeks <sup>a</sup> |
| Santos et al.     | 5/6                                                     | Not measured                                                              | 83%                                           | 63 hours               |
| Szivak et al.     | 1/6                                                     | 3/3                                                                       | 44%                                           | 24h + no <sup>b</sup>  |
| Henning et al.    | 9/10                                                    | Not measured                                                              | 90%                                           | 2-6 weeks              |
| Nindl et al.      | 9/12                                                    | 3/3                                                                       | 80%                                           | 5 weeks                |
| Gunga et al.      | 5/8                                                     | Not measured                                                              | 63%                                           | 72 hours               |
| Opstad 1992       | 15/19                                                   | Not measured                                                              | 79%                                           | 4-5 days               |
| Opstad 1982       | 3/3                                                     | Not measured                                                              | 100%                                          | 6 days                 |
| Kyröläinen et al. | 9/11                                                    | Not measured                                                              | 82%                                           | 2 weeks                |
| Vikmoen et al.    | 4/4                                                     | 2/3                                                                       | 86%                                           | 1+2 weeks <sup>c</sup> |
| Mourtakos et al.  | 4/4                                                     | Not measured                                                              | 100%                                          | 30 days                |

<sup>a</sup>= Biomarkers were measured for 1 week, and physical performance for 2 weeks. <sup>b</sup>= Physical performance recovery was not measured at all. However, since no physical performance markers were affected at post, the data is reported on the physical performance column. <sup>c</sup>=All markers were measured for two weeks, but all biomarkers recovered within one week.
