# Supplementary material
Source: MDPI journal article supplement (https://www.mdpi.com/2673-9488/3/4/46)
Supplement: s1 [file s1]

**SUPPLEMENTARY TABLE 1. QualSyst**

|                                                                                                      | Conkrig<br>ht et al. | Hamarslan<br>d et al. | Santos<br>et al. | Szivak<br>et al. | Henning et<br>al. | Nindl et<br>al. | Gunga<br>et al. | Opstad,<br>1994 | Opstad,<br>1982 | Kyröläin<br>en et al. | Vikmoen<br>et al. | Mourtakos<br>et al. |
|------------------------------------------------------------------------------------------------------|----------------------|-----------------------|------------------|------------------|-------------------|-----------------|-----------------|-----------------|-----------------|-----------------------|-------------------|---------------------|
| Question/objective sufficiently described?                                                           | 2                    | 2                     | 1                | 2                | 1                 | 2               | 1               | 2               | 1               | 2                     | 2                 | 1                   |
| Study design evident/appropriate?                                                                    | 1                    | 1                     | 1                | 1                | 1                 | 1               | 2               | 1               | 1               | 2                     | 1                 | 1                   |
| Method of subject selection described and appropriate?                                               | 1                    | 1                     | 1                | 1                | 1                 | 2               | 1               | 1               | 1               | 2                     | 2                 | 1                   |
| Subject characteristics sufficiently described?                                                      | 2                    | 1                     | 2                | 1                | 2                 | 2               | 2               | 1               | 2               | 1                     | 2                 | 1                   |
| Random allocation possible/described?                                                                | N/A                  | N/A                   | N/A              | N/A              | N/A               | N/A             | N/A             | N/A             | 0               | N/A                   | N/A               | N/A                 |
| Blinding of intervention and investigators possible/described?                                       | N/A                  | N/A                   | N/A              | N/A              | N/A               | N/A             | N/A             | N/A             | N/A             | N/A                   | N/A               | N/A                 |
| Blinding of intervention and subjects possible/described?                                            | N/A                  | N/A                   | N/A              | N/A              | N/A               | N/A             | N/A             | N/A             | N/A             | N/A                   | N/A               | N/A                 |
| Outcome measures well defined and robust to measurement/misclassification bias? Means of assessments | 2                    | 1                     | 1                | 1                | 2                 | 1               | 1               | 1               | 1               | 1                     | 1                 | 1                   |
| Sample size appropriate?                                                                             | 1                    | 1                     | 2                | 1                | 1                 | 1               | 2               | 1               | 1               | 1                     | 1                 | 1                   |
| Analytic methods described/justified and appropriate?                                                | 2                    | 1                     | 2                | 2                | 2                 | 2               | 2               | 1               | 1               | 2                     | 1                 | 1                   |
| Some estimate of variance reported for main results?                                                 | 0                    | 0                     | 0                | 0                | 2                 | 0               | 0               | 2               | 1               | 0                     | 1                 | 0                   |
| Controlled for confounding?                                                                          | 0                    | 0                     | 0                | 0                | 0                 | 0               | 0               | 0               | 0               | 0                     | 0                 | 0                   |
| Results reported in sufficient detail?                                                               | 2                    | 2                     | 2                | 1                | 2                 | 1               | 1               | 2               | 1               | 1                     | 2                 | 1                   |
| Conclusions supported by results?                                                                    | 1                    | 1                     | 2                | 1                | 1                 | 0               | 1               | 2               | 2               | 2                     | 2                 | 2                   |
| Total                                                                                                | 14/22                | 11/22                 | 14/22            | 11/22            | 15/22             | 12/22           | 14/22           | 14/22           | 12/24           | 14/22                 | 15/22             | 10/22               |
| Rating                                                                                               | Mod                  | Weak                  | Mod              | Weak             | Mod               | Weak            | Mod             | Mod             | Weak            | Mod                   | Mod               | Weak                |
