# Supplementary material
Source: MDPI journal article supplement (https://www.mdpi.com/2673-9488/3/4/46)
Supplement: s1 [file s1]

**SUPPLEMENTARY TABLE 5. Summary of biomarker recovery in studies**

| Study             | Biomarkers measured | Biomarkers recovered | Biomarkers not recovered | Biomarkers not affected during training | Recovery measured for |
|-------------------|---------------------|----------------------|--------------------------|-----------------------------------------|-----------------------|
| Hamarsland et al. | 13                  | 11                   | 2 <sup>a</sup>           | 0                                       | 1 week                |
| Santos et al.     | 6                   | 5                    | 1                        | 0                                       | 63 hours              |
| Szivak et al.     | 6                   | 1                    | 5 <sup>b</sup>           | 0                                       | 24 hours              |
| Henning et al.    | 10                  | 9                    | 1 <sup>c</sup>           | 0                                       | 2-6 weeks             |
| Nindl et al.      | 12                  | 6                    | 3 <sup>d</sup>           | 3                                       | 5 weeks               |
| Gunga et al.      | 8                   | 5                    | 3                        | 0                                       | 72 hours              |
| Opstad 1994       | 19                  | 6                    | 4                        | 9 <sup>e</sup>                          | 4-5 days              |
| Opstad 1982       | 3                   | 3                    | 0                        | 0                                       | 6 days                |
| Kyröläinen et al. | 11                  | 8                    | 2 <sup>f</sup>           | 1                                       | 2 weeks               |
| Vikmoen et al.    | 4                   | 4                    | 0                        | 0                                       | 1 week <sup>g</sup>   |
| Mourtakos et al.  | 4                   | 4                    | 0                        | 0                                       | 30 days               |

Note: “Biomarkers measured” includes only markers of which data was reported also during recovery. Note: if a marker was increased over pre values at recovery after being decreased compared to pre during training, it was considered recovered. Or, if a marker was decreased during training, but increased compared to pre at recovery point, it was also considered recovered).

<sup>a</sup>= TSH increased only after 1 week, no effect at post, therefore can't be concluded if recovered or not.

Categorized here to not be recovered. <sup>b</sup>= NPY was not affected at post, but was decreased at recovery point, therefore not counted as recovered. <sup>c</sup>= T3 was not affected at post, but elevated at recovery point, therefore not counted as recovered. <sup>d</sup>= Lactate was not affected at post, but elevated at recovery point, therefore not counted as recovered. <sup>e</sup>= or no rhythm shown. <sup>f</sup>= T4 and urea were not affected at post (at 7-8 days), but higher at recovery, therefore not considered recovered. <sup>g</sup>= Recovery was measured for two weeks, but all biomarkers recovered within one week.
