# Supplementary material
Source: MDPI journal article supplement (https://www.mdpi.com/2673-9488/3/4/46)
Supplement: s1 [file s1]

Archive with 5 entries (5 files):
- SUPPLEMENTARY TABLE 1.pdf
- SUPPLEMENTARY TABLE 2.pdf
- SUPPLEMENTARY TABLE 3.pdf
- SUPPLEMENTARY TABLE 4.pdf
- SUPPLEMENTARY TABLE 5.pdf
